# Supplementary material for: Essential Amino Acid-Enriched Diet Alleviates Dexamethasone-Induced Loss of Muscle Mass and Function through Stimulation of Myofibrillar Protein Synthesis and Improves Glucose Metabolism in Mice
Source: MDPI journal article supplement (doi:10.3390/metabo12010084), 2022-01-16
Supplement: s1 [file s1]

## Supplementary data

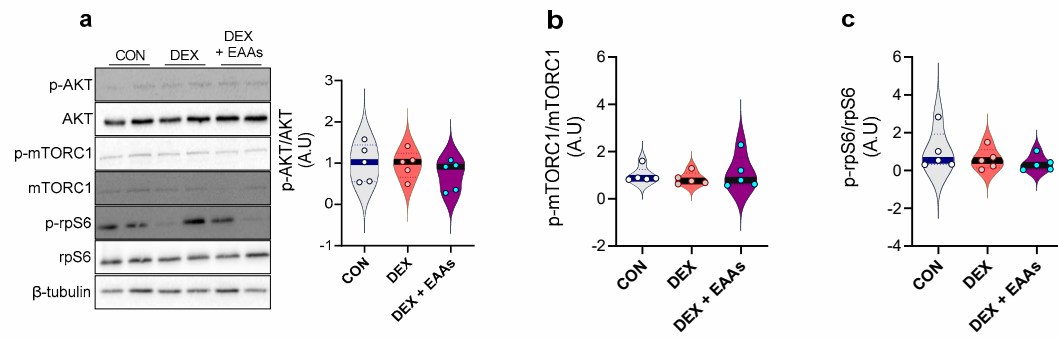

**Supplementary Figure S1.** Ratio of phosphorylated (a) Akt, (b) mTORC1, and (c) rpS6 proteins (normalized by each total protein expression). Akt, A protein cloned from the v-akt oncogene of retrovirus AKT8; mTORC1, Mammalian target of rapamycin complex1; rpS6, Ribosomal protein S6.
